# Supplementary material for: Highly efficient synthesis of phosphatidylserine in the eco-friendly solvent γ-valerolactone
Source: Royal Society of Chemistry journal article supplement (doi:10.1039/c2gc35092k), 2012-01-01
Supplement: c2gc35092k.pdf [file c2gc35092k.pdf]

1 ***Electronic Supplementary Information (ESI):***

2 **Highly efficient synthesis of phosphatidylserine in the eco-friendly solvent  $\gamma$ -valerolactone**

3 Zhang-Qun Duan\*<sup>a</sup> and Fei Hu<sup>a,b</sup>

4  
5 <sup>a</sup> Academy of State Administration of Grain, Beijing 100037, P. R. China. Fax: +86-10-58523599;

6 Tel: +86-10-58523615; E-mail: [bioduan@gmail.com](mailto:bioduan@gmail.com) (Dr. Z. Q. Duan)

7 <sup>b</sup> Hefei University of Technology, Hefei 230009, P. R. China.

8  
9 **Experimental section**

10 **Biological and chemical materials**

11 PC ( $\geq 99\%$ , from Soybean), PS ( $\geq 97\%$ , from Soybean), PA (98%, from Soybean),  $\gamma$ -valerolactone  
12 (99%), PLD-3 (from *Arachis hypogaea*, 32.8 U mg<sup>-1</sup>), PLD-4 (from Cabbage, 335 U mg<sup>-1</sup>) and PLD-5  
13 (from *Streptomyces* sp., 156 U mg<sup>-1</sup>) were purchased from Sigma-Aldrich (USA). PLD-1 (from  
14 *Streptomyces chromofuscus*, 60 U mg<sup>-1</sup>) and PLD-2 (from *Streptomyces* sp., 100 U mg<sup>-1</sup>) were  
15 purchased from Asahi-kasei pharma corporation (Japan). All other chemicals and reagents used were  
16 obtained from commercial sources and were of analytical grade.

17 All the enzymes are lyophilized powder. The enzyme activity determination approach was as  
18 follows: 3.0 mL  $\gamma$ -valerolactone containing 0.05 mmol PC, 0.15 mmol L-serine, 1 mg enzyme and 0.5%  
19 water (based on the total weight of the reaction system) were incubated in an air-bath rotary shaker at  
20 180 rpm at 40 °C. One unit was defined as the amount of enzyme which catalyzed 1  $\mu$ mole PC to form  
21 PS per hour at 40 °C. The enzymatic activity profiles of the PLDs used were depicted in Fig. 1s. All  
22 the data were averages of experiments performed at least in duplicate.

23 The thermal stability of PLD-1 was also investigated (as presented in Fig. 2s). PLD-1 was  
24 incubated in an air-bath rotary shaker at 20 °C, 30 °C, 40 °C, 50 °C, 60 °C and 70 °C, respectively, for  
25 1 h. The enzyme residual activity was calculated by the enzyme activity determination method as  
26 described above. All the data were averages of experiments performed at least in duplicate.

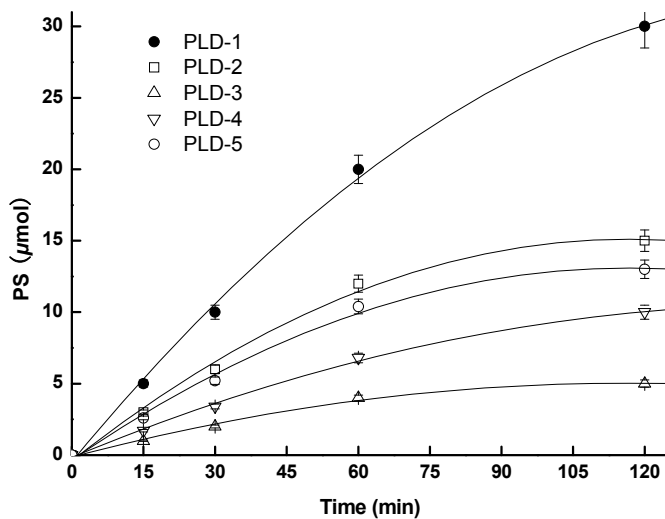

1

2 Fig. 1s The enzymatic activity of PLDs.

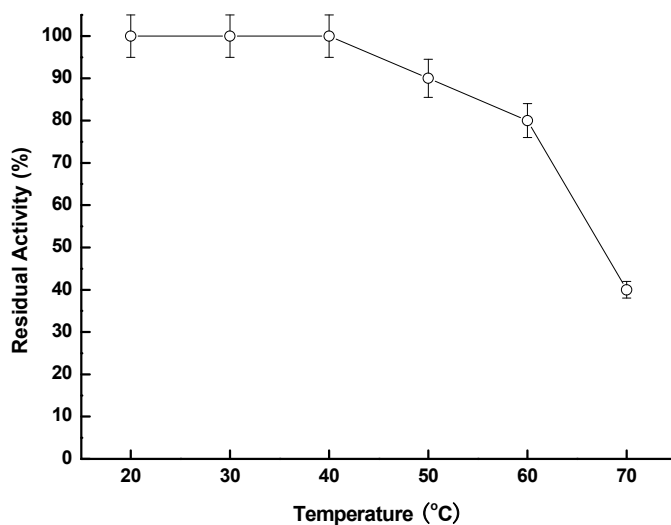

3

4 Fig. 2s The thermal stability of PLD-1.

### 5 General procedure for enzymatic synthesis of PS

6 In a typical experiment, the enzymatic transphosphatidylation was performed in a 10 mL flask on an  
7 air-bath rotary shaker at 180 rpm. The compositions of the reaction mixtures were as follows: 3.0 mL  
8 of  $\gamma$ -valerolactone, 0.05 mmol PC, a certain amount of L-serine, enzyme and 0.5% water (based on the  
9 total weight of the reaction system). 50  $\mu$ L samples were taken from the reaction mixture at specified

1 time intervals, centrifuged to obtain the upper layer and analyzed by HPLC.

2 During the experiments of comparing the reaction systems, the  $\gamma$ -valerolactone system containing  
3 3.0 mL of  $\gamma$ -valerolactone, 0.05 mmol PC, 0.15 mmol L-serine, 60 U PLD-1 and 0.5% water (based on  
4 the total weight of the reaction system) was incubated in an air-bath rotary shaker at 180 rpm at 40 °C.  
5 By contrast, in the biphasic system, the reaction mixtures were replaced by 1.5 mL ethyl acetate  
6 (containing 0.05 mmol PC) and 1.5 mL 0.2 M acetate buffer (pH=5.5, containing 0.15 mmol L-serine  
7 and 60 U PLD-1), and the others were the same; in the purely aqueous system, the reaction mixtures  
8 were replaced by 3.0 mL 0.2 M acetate buffer (pH=5.5, containing 0.05 mmol PC, 0.15 mmol L-serine  
9 and 60 U PLD-1), and the others were the same.

10 In the experiments of investigating the temperature effect on the reaction, the conditions were as  
11 follows: 3.0 mL of  $\gamma$ -valerolactone, 0.05 mmol PC, 0.15 mmol L-serine, 60 U PLD-1, 0.5% water  
12 (based on the total weight of the reaction system).

13 In the experiments of investigating the substrate molar ratio effect on PS yield, the conditions were  
14 as follows: 3.0 mL of  $\gamma$ -valerolactone, 0.05 mmol PC, 60 U PLD-1, 0.5% water (based on the total  
15 weight of the reaction system), 40 °C, 12 h.

16 In the experiments of PS synthesis catalyzed by various PLDs, the conditions were as follows: 3.0  
17 mL of  $\gamma$ -valerolactone, 0.05 mmol PC, 0.15 mmol L-serine, 60 U enzyme, 0.5% water (based on the  
18 total weight of the reaction system), 40 °C, 12 h. The control reaction was performed by following the  
19 above procedure except that no enzyme was added.

20

## 21 **HPLC analysis**

22 The samples were detected using the method described by Agilent Technologies.<sup>1</sup> The sample was  
23 analyzed by a Waters e2695 HPLC system (Waters, Milford, USA) with an evaporative light  
24 scattering detector (ELSD). External standards of PC, PS and PA were used to prepare calibration  
25 solutions at five different concentrations. 2  $\mu$ L sample and 1 mL hexane-isopropane (1/1, v/v) were  
26 precisely measured and mixed thoroughly. 10  $\mu$ L of the aforementioned mixture was injected. The  
27 stationary and mobile phases were a Lichrospher 100 Diol column (5  $\mu$ m, 250 mm  $\times$  4.6 mm) (Merck

1 Chemicals, Germany) and a gradient elution program (Table 1s) at 1.5 mL min<sup>-1</sup>, respectively. The  
2 column temperature and drift pipe temperature were controlled at 25 and 65 °C, respectively, and the  
3 nitrogen pressure was controlled at 40 psi. The retention times were 2.520, 2.948, and 23.826 min for  
4 PA, PS and PC, respectively (Fig. 3s). PS yield was calculated from the HPLC data. The average error  
5 for this assay is less than 0.5%. All the reported data are averages of experiments performed at least in  
6 duplicate.

7 Table 1s Gradient elution program\*

| Time (min) | Flow rate (mL min <sup>-1</sup> ) | Hexane-isopropanol-methanol (95/2.5/2.5) (v/v, %) | Isopropanol-methanol (40/60) (v/v, %) |
|------------|-----------------------------------|---------------------------------------------------|---------------------------------------|
| 0          | 1.50                              | 100                                               | 0                                     |
| 20.0       | 1.50                              | 81.3                                              | 18.7                                  |
| 20.2       | 1.50                              | 0                                                 | 100                                   |
| 25.0       | 1.50                              | 0                                                 | 100                                   |
| 25.1       | 1.50                              | 100                                               | 0                                     |
| 30.0       | 1.50                              | 100                                               | 0                                     |

8 \* Each mobile phase contained 1 mM ammonium acetate.

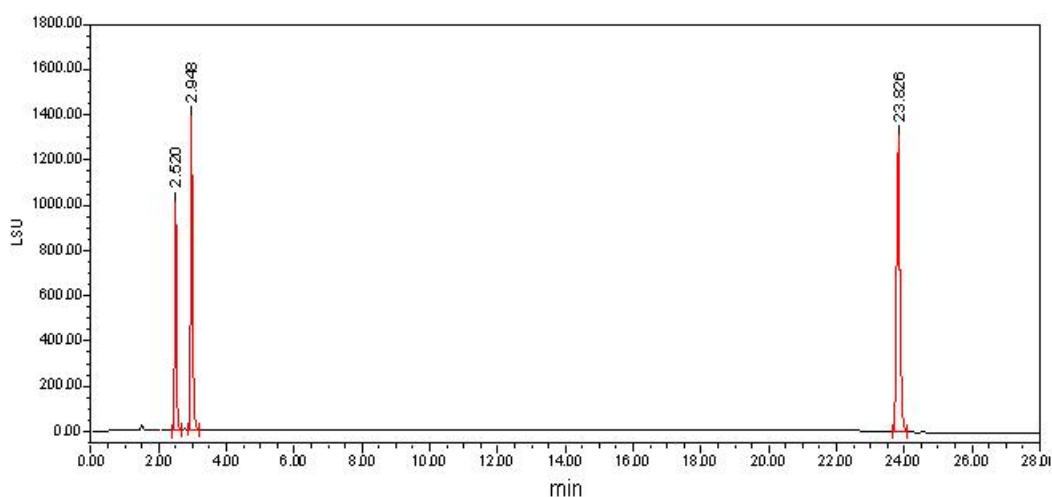

9

10 Fig. 3s The sample chromatogram with a mixture of PA, PS and PC.

11 1 C. Woodward and R. Majors. The HPLC preparative scale-up of soybean phospholipids. Agilent Technologies  
12 Publications 5989-2848EN, [www.agilent.com/chem/cn](http://www.agilent.com/chem/cn).
